# Supplementary material for: Genomic Engineering of Oral Keratinocytes to Establish In Vitro Oral Potentially Malignant Disease Models as a Platform for Treatment Investigation
Source: MDPI journal article supplement (doi:10.3390/cells13080710), 2024-04-19
Supplement: s1 [file s1]

**Supplementary Table S2** Used medium, number of plated cells and incubation times for cell lines cultured for investigation of small molecule inhibitor experiments. In the cell line names, <sup>KO</sup> indicates that a knockout was performed for the specified gene, while + indicates that the gene was ectopically expressed.

| Cell line                                             | Medium | Cells per well for dose response analysis | CellTiter-Blue incubation time (minutes) |
|-------------------------------------------------------|--------|-------------------------------------------|------------------------------------------|
| VU-preSCC-LP084-TERT <sup>+</sup>                     | KGM    | 3000                                      | 180                                      |
| VU-preSCC-LP121-p16 <sup>KO</sup> -TERT <sup>+</sup>  | KGM    | 3000                                      | 180                                      |
| VU-preSCC-LP140-p16 <sup>KO</sup> -TERT <sup>+</sup>  | KGM    | 3000                                      | 180                                      |
| VU-preSCC-HN1028-p16 <sup>KO</sup> -TERT <sup>+</sup> | KGM    | 3000                                      | 180                                      |
| VU-preSCC-M3                                          | KGM    | 3000                                      | 180                                      |
| VU-preSCC-M3-TERT <sup>+</sup>                        | KGM    | 3000                                      | 180                                      |
| UPPP-60                                               | KGM    | 3000                                      | 180                                      |
| UPPP-60-p16 <sup>KO</sup> -TERT <sup>+</sup>          | KGM    | 3000                                      | 180                                      |
| UM-SCC-22A                                            | DMEM   | 4000                                      | 120                                      |
