# Supplementary material for: Genomic Engineering of Oral Keratinocytes to Establish In Vitro Oral Potentially Malignant Disease Models as a Platform for Treatment Investigation
Source: Cells. 2024 Apr 19;13(8):710. doi: 10.3390/cells13080710 (PMC11049138; doi:10.3390/cells13080710)
Supplement: Supplementary file 1 [file cells-13-00710-s001.zip]

Archive with 13 entries (13 files):
- Cells_Supplementary_Figure_Legends_R1.pdf
- Supplementary_Figure_S1.pdf
- Supplementary_Figure_S10.png
- Supplementary_Figure_S2.pdf
- Supplementary_Figure_S3.pdf
- Supplementary_Figure_S4.png
- Supplementary_Figure_S5.png
- Supplementary_Figure_S6.png
- Supplementary_Figure_S7.pdf
- Supplementary_Figure_S8.png
- Supplementary_Figure_S9.png
- Supplementary_Table_S1.xlsx
- Supplementary_Table_S2.pdf
