# Supplementary material for: Genomic Engineering of Oral Keratinocytes to Establish In Vitro Oral Potentially Malignant Disease Models as a Platform for Treatment Investigation
Source: Cells. 2024 Apr 19;13(8):710. doi: 10.3390/cells13080710 (PMC11049138; doi:10.3390/cells13080710)
Supplement: Supplementary file 1 [file cells-13-00710-s001.zip › Supplementary_Table_S1.xlsx]

## Sheet: Supplementary_Table_S1.tsv
Sample	POS	hugoSymbol	REF	ALT	DP	AD	VAF	proteinChange
LP085	16462158	EPHA2	G	T	1379	33	0.0239303843364757	p.R474S
LP126	16475097	EPHA2	T	C	1468	751	0.51158038147139	p.K200R
LP092	16477423	EPHA2	G	C	4218	2039	0.483404457088668	p.L41V
LP085	534289	HRAS	C	A	1998	483	0.241741741741742	p.G12C
LP085	49422735	KMT2D	G	T	1781	49	0.0275126333520494	p.P4753Q
LP105	49426285	KMT2D	G	T	6004	2084	0.347101932045303	p.S4068*
LP085	49433077	KMT2D	GACCCTGGCCCCAGGATGGGGCC	G	2095	358	0.170883054892601	p.G2758fs
LP085	49433511	KMT2D	C	A	1985	42	0.0211586901763224	p.R2681L
LP126	23451321	AJUBA	GCTCCTCGGGGC	G	1482	96	0.0647773279352227	p.P49fs
LP117	7569546	TP53	C	G	3364	1553	0.461652794292509	p.R337T
LP126	7574003	TP53	G	A	1294	123	0.0950540958268934	p.R342*
LP104	7577121	TP53	G	A	1178	303	0.257215619694397	p.R273C
LP104	7577538	TP53	C	T	936	35	0.0373931623931624	p.R248Q
LP059	7577548	TP53	C	T	1820	1246	0.684615384615385	p.G245S
LP126	7577551	TP53	C	T	1396	87	0.0623209169054441	p.G244S
LP107	7577570	TP53	C	T	4574	742	0.162221250546568	p.M237I
LP104	7578263	TP53	G	A	920	42	0.0456521739130435	p.R196*
LP091	7578263	TP53	G	A	3594	947	0.263494713411241	p.R196*
LP114	7578406	TP53	C	T	5158	3333	0.646180690189996	p.R175H
LP098	7578406	TP53	C	T	2979	1258	0.42228935884525	p.R175H
LP057	7579471	TP53	GG	AC	1552	778	0.501288659793814	p.P72R
LP078	7579546	TP53	CG	C	2122	1077	0.507540056550424	p.P47fs
LP085	178096144	NFE2L2	G	T	2617	61	0.0233091325945739	p.P373Q
LP085	178097179	NFE2L2	C	A	2643	61	0.0230798335225123	p.G156C
LP085	202131444	CASP8	C	A	2328	53	0.022766323024055	p.L79I
LP113	202137478	CASP8	G	C	904	463	0.51216814159292	p.D177H
LP105	202141691	CASP8	GGTACAGTA	G	5074	2419	0.476744186046512
LP085	202149634	CASP8	C	A	2476	48	0.0193861066235864	p.Q300K
LP085	202149832	CASP8	C	A	2185	54	0.0247139588100686	p.Q366K
LP059	31022382	ASXL1	CAGGTCCGAGGGGCGAG	C	2373	315	0.132743362831858	p.R625fs
LP117	31022424	ASXL1	GC	G	3758	141	0.0375199574241618	p.T638fs
LP114	31022441	ASXL1	AG	A	4108	470	0.114410905550146	p.G645fs
LP085	30686271	TGFBR2	G	T	2577	73	0.0283275126115638	p.G43C
LP092	49405953	RHOA	C	T	3051	1033	0.338577515568666	p.G62E
LP104	178916957	PIK3CA	G	C	761	174	0.228646517739816	p.R115P
LP085	178919165	PIK3CA	C	A	3183	62	0.019478479421929	p.P217Q
LP105	178927980	PIK3CA	T	C	4531	1557	0.343632752151843	p.C420R
LP085	178943828	PIK3CA	G	T	2848	77	0.0270365168539326	p.R832L
LP093	189586403	TP63	C	T	1037	84	0.0810028929604629	p.R343W
LP126	189590764	TP63	C	G	1246	24	0.0192616372391653	p.H443Q
LP085	189604211	TP63	G	T	2913	65	0.0223137658771026	p.G460C
LP132	1803663	FGFR3	G	A	1656	828	0.5	p.A281T
LP085	187521286	FAT1	G	T	2202	55	0.0249772933696639	p.R3957S
LP059	187522462	FAT1	AACCGCATGCGTGGAATATGTTCTGAGCCTCATGGTCAGTTTCATCTCT	A	1831	58	0.0316766794101584	p.3851_3867LEMKLTMRLRTYSTHAV>F
LP085	187525020	FAT1	AG	CT	2284	25	0.0109457092819615	p.S3554A
LP085	187530955	FAT1	C	A	2523	61	0.0241775663892192	p.T3356T
LP085	187531116	FAT1	G	T	2344	48	0.0204778156996587	p.L3303I
LP085	187532696	FAT1	G	T	2245	53	0.0236080178173719	p.R3233S
LP091	187532926	FAT1	A	C	2748	127	0.0462154294032023	p.L3156*
LP085	187539699	FAT1	G	A	2746	1368	0.498179169701384	p.P2681S
LP093	187540278	FAT1	GCAAATTGCCTC	G	1094	286	0.261425959780622	p.G2484fs
LP107	187540932	FAT1	C	T	3893	1858	0.477266889288467	p.D2270N
LP085	187540996	FAT1	CG	TT	2302	13	0.00564726324934839	p.P2248Q
LP085	187541940	FAT1	C	A	2454	47	0.0191524042379788	p.G1934C
LP085	187542261	FAT1	C	A	2644	70	0.0264750378214826	p.G1827C
LP085	187549918	FAT1	C	A	2402	56	0.0233139050791007
LP085	187629282	FAT1	G	T	2406	48	0.0199501246882793	p.P567H
LP059	187630453	FAT1	C	A	1410	109	0.0773049645390071	p.D177Y
LP085	176638099	NSD1	C	A	2645	70	0.0264650283553875	p.P900H
LP085	176638533	NSD1	C	A	2528	65	0.0257120253164557	p.R1045S
LP085	176687169	NSD1	G	T	2341	47	0.0200768902178556	p.G1716*
LP085	176700711	NSD1	GC	G	2519	563	0.223501389440254	p.Q1851fs
LP085	176709466	NSD1	G	T	2097	44	0.0209823557463042	p.G1965C
LP107	21971120	CDKN2A	G	A	4327	1549	0.357984746937832	p.R29*
LP114	21971120	CDKN2A	G	A	4472	2798	0.62567084078712	p.R29*
LP104	21971186	CDKN2A	G	A	935	380	0.406417112299465	p.R7*
LP113	139391863	NOTCH1	CG	C	854	68	0.0796252927400468	p.I2109fs
LP114	139395171	NOTCH1	G	A	4523	2517	0.556489055936325	p.Q1923*
LP126	139401039	NOTCH1	AT	A	1313	29	0.0220868240670221	p.N1318fs
LP126	139405132	NOTCH1	CGCAG	C	1470	124	0.0843537414965986	p.N903fs
LP105	139407524	NOTCH1	ACG	A	4771	1733	0.36323621882205	p.T805fs
LP126	139412239	NOTCH1	T	C	1222	37	0.030278232405892	p.D469G
LP126	139412244	NOTCH1	G	C	1222	311	0.254500818330606	p.C467W
LP105	139412690	NOTCH1	G	T	6233	2203	0.353441360500562	p.S385Y
LP126	139413088	NOTCH1	C	A	1262	67	0.0530903328050713	p.D352Y
LP085	44918711	KDM6A	G	T	2801	65	0.0232059978579079	p.Q398H
LP140	49436401	KMT2D	G	A	4354	85	0.0195222783647221	p.S1937F
LP140-p16-TERT	48878072	RB1	A	C	4296	313	0.0728584729981378	p.K8N
HN-preSCC-1031	7578190	TP53	T	C	2425	151	0.0622680412371134	p.Y220C
HN-preSCC-1031	7578269	TP53	G	A	2753	165	0.0599346167816927	p.L194F
HN-preSCC-1031	7578395	TP53	G	C	2789	198	0.0709931875224095	p.H179D
VU-UPPP-60	7579373	TP53	C	T	2862	60	0.0209643605870021	p.G105D
LP140	30713819	TGFBR2	A	G	4855	258	0.0531410916580844	p.S382G
LP140-p16-TERT	21974660	CDKN2A	GCAGACCCTCTACCCACCTGGATCGGC	G	3830	2006	0.523759791122715
LP121-p16-TERT	21974665	CDKN2A	CCCTCTACCCACCTGGATCGG	C	4919	2186	0.444399268143932
LP140-p16-TERT	21974666	CDKN2A	CCTCTACCCACCTGGATCGG	C	1662	553	0.332731648616125
LP121-p16-TERT	21974675	CDKN2A	ACCTGGATCGG	A	2451	2451	1
LP140-p16-TERT	21974675	CDKN2A	A	AGCCCCT	973	972	0.998972250770812
LP140-p16-TERT	21974678	CDKN2A	TGG	T	936	935	0.998931623931624	p.Q50fs
LP140-p16-TERT	21974681	CDKN2A	A	C	928	927	0.998922413793103	p.I49S
LP140-p16-TERT	21974682	CDKN2A	T	TTTTA	928	927	0.998922413793103	p.I49fs
HN-preSCC-1031	139399276	NOTCH1	C	A	3043	396	0.130134735458429	p.E1623*
HN-preSCC-1031	139412240	NOTCH1	C	A	2678	54	0.0201643017176998	p.D469Y
HN-preSCC-1031	139413049	NOTCH1	G	A	2459	139	0.0565270435136234	p.R365C
LP140	44733187	KDM6A	T	G	2084	175	0.0839731285988484	p.V60G
VU-preSCC-HN1028-p16-p53-TERT-P26	49435188	KMT2D	G	T	4875	132	0.0270769230769231	p.P2122H
VU-preSCC-HN1029-p16-P21	7577538	TP53	C	T	3625	605	0.166896551724138	p.R248Q
VU-preSCC-HN1009-p16-p53-P15	7577568	TP53	C	T	1388	75	0.0540345821325648	p.C238Y
VU-preSCC-HN1031-p16-P22	7578190	TP53	T	C	3856	1965	0.509595435684647	p.Y220C
VU-preSCC-HN1031-p16-TERT-P22	7578190	TP53	T	C	4439	3616	0.814597882405947	p.Y220C
VU-preSCC-HN1031-p16-P22	7578208	TP53	T	C	3831	1850	0.482902636387366	p.H214R
VU-preSCC-HN1029-p16-p53-P33	7578211	TP53	C	A	3126	321	0.102687140115163	p.R213L
VU-preSCC-HN1037-p16-p53-TERT-P5	7578230	TP53	C	G	2606	364	0.139677666922487	p.D207H
VU-preSCC-HN1031-TERT-P5	7578242	TP53	C	T	4400	92	0.0209090909090909	p.V203M
VU-preSCC-HN1031-p16-TERT-P22	7578269	TP53	G	A	4652	689	0.14810834049871	p.L194F
VU-preSCC-HN1029-p16-p53-TERT-P37	7578342	TP53	CTGTCGTCTCTCCAGCCCCAGCTGCTCACCATCGCTATCTGAGCAGCGCTCATGG	C	1948	107	0.0549281314168378
VU-preSCC-HN1037-p16-p53-TERT-P5	7578348	TP53	TCTCTCCAGCCCCAGCTGCTCACCATCG	T	3008	67	0.0222739361702128
VU-UPPP-60-p16-p53-P31	7578350	TP53	TCTCCAGCCCCAGCTGCTCACCATCG	T	58	13	0.224137931034483
VU-UPPP-60-p16-p53-TERT-P32	7578350	TP53	TCTCCAGCCCCAGCTGCTCACCATCG	T	1559	394	0.252726106478512
VU-preSCC-HN1029-p16-p53-TERT-P37	7578352	TP53	TCCAGCCCCAGCTGCTCACCATCG	T	1339	493	0.368185212845407
VU-preSCC-HN1029-p16-p53-TERT-P37	7578353	TP53	CCAGCCCCAGCTGCTCACCATCGCTATCTGAG	C	967	33	0.0341261633919338
VU-preSCC-HN1029-p16-p53-TERT-P37	7578354	TP53	CAGCCCCAGCTGCTCACCATCGCTATCTG	C	912	47	0.0515350877192982
VU-UPPP-60-p16-p53-TERT-P32	7578359	TP53	CCAGCTGCTCACCATCGCTATCTGAG	C	1142	69	0.0604203152364273
VU-preSCC-HN1031-p16-p53-TERT-P22	7578360	TP53	CAGCTGCTCACCATCGCTATCTG	C	5349	159	0.0297251822770611
VU-preSCC-HN1037-p16-p53-P5	7578362	TP53	GCTGCTCACCATCGCTAT	G	2977	338	0.11353711790393
VU-preSCC-HN1037-p16-p53-TERT-P5	7578362	TP53	GCTGCTCACCATCGCTAT	G	2578	240	0.0930954228083786
VU-UPPP-60-p16-p53-P31	7578364	TP53	TGCTCACCATCGCTATCTGAGCAGC	T	57	15	0.263157894736842
VU-UPPP-60-p16-p53-TERT-P32	7578364	TP53	TGCTCACCATCGCTATCTGAGCAGC	T	1133	439	0.387466902030009
VU-UPPP-60-p16-p53-TERT-P32	7578365	TP53	GCTCACCATCGCTATCTGAGCAGCGCTCATGGTGGGGGCAGCGCCTCACAAC	G	974	80	0.082135523613963
VU-preSCC-HN1037-p16-p53-P5	7578365	TP53	GCTCACCATCGCTAT	G	2616	142	0.0542813455657492
VU-preSCC-HN1037-p16-p53-TERT-P5	7578365	TP53	GCTCACCATCGCTAT	G	2291	113	0.0493234395460498
VU-preSCC-HN1037-p16-p53-P5	7578368	TP53	CACCATCG	C	2370	53	0.0223628691983122
VU-preSCC-HN1037-p16-p53-TERT-P5	7578368	TP53	CACCATCG	C	2112	55	0.0260416666666667
VU-UPPP-60-p16-p53-P31	7578369	TP53	ACCATCG	A	9	3	0.333333333333333
VU-UPPP-60-p16-p53-TERT-P32	7578369	TP53	ACCATCG	A	419	184	0.439140811455847
VU-preSCC-HN1028-p16-p53-P29	7578369	TP53	ACCATCGCTATCTGAGCAGCGCTCATGGTGGGGGCAGCGCCTCACAACCTCCGTCATGTGCTGTGACTGCTTGTAGATGGCCATGGCGCGGACGCGGGTGCCGGGCGGGGGTGTGGAATCAACCCACAGCTGCACAGGGCAGGTCTTGGCCAGTTGGCAAAACATCTTGTT	A	2199	15	0.00682128240109141
VU-preSCC-HN1028-p16-p53-P29	7578369	TP53	ACCATCGCTATCTGAGCAGCGCTCATGGTGGGGGCAGCGCCTCACAACCTCCGTCATGTGCTGTGACTGCTTGTAGATGGCCATGGCGCGGACGCGGGTGCCGGGCGGGGGTGTGGAATCAACCCACAGCTGCACAGGGCAGGTCTTGGCCAGTTGGCAAAACATCTTGTT	ACTATCTGAGCAGCGCTCATGGTGGGGGCAGCGCCTCACAACCTCCGTCATGTGCTGTGACTGCTTGTAGATGGCCATGGCGCGGACGCGGGTGCCGGGCGGGGGTGTGGAATCAACCCACAGCTGCACAGGGCAGGTCTTGGCCAGTTGGCAAAACATCTTGTT	2199	1481	0.673487949067758
VU-preSCC-HN1028-p16-p53-TERT-P26	7578369	TP53	ACCATCG	A	3258	2209	0.678023327194598
VU-preSCC-HN1029-p16-TERT-P25	7578369	TP53	ACCATCG	A	1597	284	0.177833437695679
VU-preSCC-HN1031-p16-p53-TERT-P22	7578369	TP53	ACCATCG	A	4636	173	0.0373166522864538
VU-preSCC-HN1037-p16-p53-P5	7578369	TP53	ACCATCG	A	2297	369	0.160644318676535
VU-preSCC-HN1037-p16-p53-TERT-P5	7578369	TP53	ACCATCG	A	2052	334	0.162768031189084
VU-preSCC-HN1037-p16-p53-P5	7578370	TP53	CCATCGCTATCTGAGCAGCGCT	C	1733	71	0.0409694171956145
VU-preSCC-HN1037-p16-p53-P5	7578370	TP53	CCATCGCTATCTGAGCAGCGCT	GCATCGCTATCTGAGCAGCGCT	1733	379	0.21869590305828
VU-preSCC-HN1037-p16-p53-TERT-P5	7578370	TP53	CCATCGCTATCTGAGCAGCGCT	C	1558	86	0.055198973042362
VU-preSCC-HN1037-p16-p53-TERT-P5	7578370	TP53	CCATCGCTATCTGAGCAGCGCT	GCATCGCTATCTGAGCAGCGCT	1558	381	0.244544287548139
VU-preSCC-HN1029-p16-TERT-P25	7578371	TP53	CATCGCT	C	1498	1264	0.843791722296395	p.SD185del
VU-preSCC-HN1031-p16-p53-P22	7578371	TP53	CATCGCTATCTG	C	5347	117	0.0218814288386011	p.S183fs
VU-preSCC-HN1031-p16-p53-TERT-P22	7578371	TP53	CATCGCTATCTG	C	4500	157	0.0348888888888889	p.S183fs
VU-preSCC-HN1031-p16-p53-TERT-P22	7578371	TP53	CATCGCTATCTG	CATCTG	4500	21	0.00466666666666667	p.SD185del
VU-preSCC-HN1037-p16-p53-P5	7578371	TP53	C	CATCG	1582	139	0.0878634639696587	p.G187fs
VU-preSCC-HN1037-p16-p53-TERT-P5	7578371	TP53	C	CATCG	1401	116	0.0827980014275518	p.G187fs
VU-preSCC-HN1028-p16-p53-P29	7578372	TP53	ATCGCTATC	A	251	28	0.111553784860558	p.D184fs
VU-preSCC-HN1028-p16-p53-TERT-P26	7578372	TP53	ATCGCT	A	1145	308	0.268995633187773	p.S185fs
VU-preSCC-HN1029-p16-TERT-P25	7578372	TP53	ATC	A	424	57	0.134433962264151	p.D186fs
VU-preSCC-HN1028-p16-p53-TERT-P26	7578373	TP53	T	TGAG	573	243	0.424083769633508	p.D186AH
VU-preSCC-HN1029-p16-p53-TERT-P37	7578373	TP53	TCGCTATCTGAGCAG	T	634	6	0.00946372239747634	p.C182fs
VU-preSCC-HN1029-p16-p53-TERT-P37	7578373	TP53	TCGCTATCTGAGCAG	TCTATCTGAGCAG	634	623	0.982649842271293	p.S185fs
VU-preSCC-HN1031-p16-p53-P22	7578373	TP53	TCGC	T	5011	123	0.0245459988026342	p.185_186SD>N
VU-preSCC-HN1031-p16-p53-TERT-P22	7578373	TP53	TCGC	T	4264	165	0.0386960600375235	p.185_186SD>N
VU-preSCC-HN1037-p16-p53-P5	7578373	TP53	TCGCTATCTGAGCAG	T	1583	276	0.17435249526216	p.C182fs
VU-preSCC-HN1037-p16-p53-P5	7578373	TP53	TCGCTATCTGAGCAG	GCGCTATCTGAGCAG	1583	360	0.227416298168035	p.D186A
VU-preSCC-HN1037-p16-p53-TERT-P5	7578373	TP53	TCGCTATCTGAGCAG	T	1396	201	0.143982808022923	p.C182fs
VU-preSCC-HN1037-p16-p53-TERT-P5	7578373	TP53	TCGCTATCTGAGCAG	GCGCTATCTGAGCAG	1396	356	0.255014326647564	p.D186A
VU-UPPP-60-p16-p53-TERT-P32	7578374	TP53	CGCTATCT	C	193	128	0.663212435233161	p.D184fs
VU-UPPP-60-p16-p53-TERT-P32	7578374	TP53	CGCTATCT	CCTATCT	193	36	0.186528497409326	p.S185fs
VU-preSCC-HN1029-p16-TERT-P25	7578374	TP53	CGCTATCTGA	C	274	145	0.529197080291971	p.SDS183del
VU-preSCC-HN1031-p16-p53-P22	7578374	TP53	CG	C	4749	2366	0.498210149505159	p.S185fs
VU-preSCC-HN1031-p16-p53-TERT-P22	7578374	TP53	CG	C	3949	1913	0.484426437072677	p.S185fs
VU-preSCC-HN1037-p16-p53-P5	7578374	TP53	CGCTATCTGA	C	1333	190	0.142535633908477	p.SDS183del
VU-preSCC-HN1037-p16-p53-P5	7578374	TP53	CGCTATCTGA	CGGCTATCTGA	1333	9	0.00675168792198049	p.D186fs
VU-preSCC-HN1037-p16-p53-TERT-P5	7578374	TP53	CGCTATCTGA	C	1206	186	0.154228855721393	p.SDS183del
VU-preSCC-HN1037-p16-p53-TERT-P5	7578374	TP53	CGCTATCTGA	CGGCTATCTGA	1206	17	0.0140961857379768	p.D186fs
VU-UPPP-60-p16-p53-TERT-P32	7578375	TP53	GCT	G	116	31	0.267241379310345	p.S185fs
VU-preSCC-HN1028-p16-p53-P29	7578375	TP53	GCT	G	129	7	0.0542635658914729	p.S185fs
VU-preSCC-HN1028-p16-p53-TERT-P26	7578375	TP53	GCTAT	G	513	39	0.0760233918128655	p.D184fs
VU-preSCC-HN1028-p16-p53-TERT-P26	7578375	TP53	GCTAT	GAT	513	50	0.0974658869395711	p.S185fs
VU-preSCC-HN1029-p16-TERT-P25	7578375	TP53	G	GAAACA	188	57	0.303191489361702	p.D186fs
VU-preSCC-HN1031-p16-p53-P22	7578375	TP53	GCT	G	4734	1219	0.257498943810731	p.S185fs
VU-preSCC-HN1031-p16-p53-P22	7578375	TP53	GCT	GT	4734	1161	0.245247148288973	p.S185fs
VU-preSCC-HN1031-p16-p53-TERT-P22	7578375	TP53	GCT	G	3943	1005	0.254882069490236	p.S185fs
VU-preSCC-HN1031-p16-p53-TERT-P22	7578375	TP53	GCT	GT	3943	1023	0.259447121481106	p.S185fs
VU-preSCC-HN1037-p16-p53-P5	7578375	TP53	GCTATCTGAGCAGCGCTC	G	1174	37	0.0315161839863714	p.E180fs
VU-preSCC-HN1037-p16-p53-P5	7578375	TP53	GCTATCTGAGCAGCGCTC	GATCTGAGCAGCGCTC	1174	108	0.0919931856899489	p.S185fs
VU-preSCC-HN1037-p16-p53-P5	7578375	TP53	GCTATCTGAGCAGCGCTC	GTATCTGAGCAGCGCTC	1174	419	0.356899488926746	p.S185fs
VU-preSCC-HN1037-p16-p53-TERT-P5	7578375	TP53	GCTATCTGAGCAGCGCTC	G	1051	29	0.027592768791627	p.E180fs
VU-preSCC-HN1037-p16-p53-TERT-P5	7578375	TP53	GCTATCTGAGCAGCGCTC	GATCTGAGCAGCGCTC	1051	72	0.0685061845861085	p.S185fs
VU-preSCC-HN1037-p16-p53-TERT-P5	7578375	TP53	GCTATCTGAGCAGCGCTC	GTATCTGAGCAGCGCTC	1051	379	0.360608943862988	p.S185fs
VU-preSCC-HN1028-p16-p53-TERT-P26	7578376	TP53	C	CTGCTCACCATCA	2747	270	0.0982890425919185	p.184_185insMMVS
VU-preSCC-HN1029-p16-TERT-P25	7578377	TP53	T	TGACAGGAAGCCAAAGGGTGAAGAGGA	1398	57	0.0407725321888412	p.D186fs
VU-preSCC-HN1031-p16-p53-P22	7578377	TP53	TATC	T	5041	123	0.0243999206506646	p.D184del
VU-preSCC-HN1031-p16-p53-TERT-P22	7578377	TP53	TATC	T	4447	165	0.0371036653923994	p.D184del
VU-preSCC-HN1037-p16-p53-P5	7578379	TP53	T	TG	1601	60	0.0374765771392879	p.D184fs
VU-preSCC-HN1037-p16-p53-P5	7578379	TP53	T	G	1601	30	0.018738288569644	p.D184A
VU-preSCC-HN1037-p16-p53-TERT-P5	7578379	TP53	T	TG	1438	38	0.0264255910987483	p.D184fs
VU-preSCC-HN1037-p16-p53-TERT-P5	7578379	TP53	T	G	1438	29	0.0201668984700974	p.D184A
VU-preSCC-HN1029-p16-TERT-P25	7578380	TP53	C	CCCAAAG	1403	28	0.0199572344975053	p.183_184insLW
VU-preSCC-HN1037-p16-p53-P5	7578380	TP53	C	G	2059	49	0.0237979601748422	p.D184H
VU-UPPP-60-p16-p53-TERT-P32	7578387	TP53	GCGCTCATGGTGGGGGCAGCGCCTCACAACCTCCGTCATGTGCTGTGACTGCTTGTAGATGGCCATGGCGCGGACGCGGGTGCCGGGCGGGGGTGTGGAATCAACCCACAGCTGCACAGGGCAGGTCTTGGCCAGTTGGCAAAACAT	G	2885	118	0.0409012131715771	p.M133fs
VU-preSCC-HN1031-p16-p53-P22	7578395	TP53	G	C	4946	119	0.0240598463404772	p.H179D
VU-preSCC-HN1031-p16-p53-TERT-P22	7578395	TP53	G	C	4518	158	0.034971226206286	p.H179D
VU-preSCC-HN1029-p16-p53-TERT-P37	7578397	TP53	TG	T	1299	51	0.0392609699769053	p.H178fs
VU-preSCC-HN1031-p16-TERT-P22	7578479	TP53	G	T	4548	104	0.0228671943711522	p.P151T
VU-UPPP-60-TERT-P10	7579373	TP53	C	T	1234	608	0.492706645056726	p.G105D
VU-preSCC-HN1031-TERT-P5	187519216	FAT1	C	G	4642	93	0.0200344679017665	p.C4056S
VU-preSCC-HN1028-p16-P20	187524986	FAT1	C	A	3576	516	0.144295302013423	p.G3565V
LP121	187538942	FAT1	TG	GT	1721	7	0.00406740267286461	p.Q2933T
VU-preSCC-HN1031-p16-P22	176637268	NSD1	A	G	4323	2166	0.501040943789035	p.Y623C
VU-preSCC-HN1029-TERT-P7	176721787	NSD1	A	C	2557	130	0.0508408290965976	p.H2473P
VU-UPPP-60-p16-p53-TERT-P32	21974657	CDKN2A	GCTGCAGACCCTCTACCCACCTGGATCGGC	G	1590	97	0.0610062893081761
VU-preSCC-LP140-p16-TERT-P10	21974657	CDKN2A	GCTGCAGACCCTCTACCCAC	G	3405	293	0.0860499265785609
VU-preSCC-LP140-p16-TERT-P13	21974657	CDKN2A	GCTGCAGACCCTCTACCCAC	G	3593	228	0.0634567214027275
VU-preSCC-LP140-p16-P15	21974660	CDKN2A	GCAGACCCTCTACCCACCTGGATCGGC	G	2272	1957	0.861355633802817
VU-preSCC-LP140-p16-TERT-P10	21974660	CDKN2A	GCAGACCCTCTACCCACCTGGATCGGC	G	3259	182	0.0558453513347653
VU-preSCC-LP140-p16-TERT-P13	21974660	CDKN2A	GCAGACCCTCTACCCACCTGGATCGGC	G	3516	208	0.0591581342434585
VU-preSCC-LP140-p16-TERT-P27	21974660	CDKN2A	GCAGACCCTCTACCCACCTGGATCGGC	G	2472	544	0.220064724919094
VU-preSCC-HN1009-p16-p53-P15	21974662	CDKN2A	AGACCCTCTACCCACCTGGATCGGCCTCC	A	2147	191	0.0889613414066139
VU-UPPP-60-p16-p53-TERT-P32	21974664	CDKN2A	ACCCTCTACCCACCTGGATCGG	A	1301	365	0.280553420445811
VU-preSCC-HN1031-p16-p53-P22	21974664	CDKN2A	ACCCTCTACCCACCTGGATCGGCCT	A	5422	980	0.180745112504611
VU-preSCC-HN1031-p16-p53-TERT-P22	21974664	CDKN2A	ACCCTCTACCCACCTGGATCGGCCT	A	5005	796	0.159040959040959
VU-preSCC-HN1028-p16-TERT-P34	21974665	CDKN2A	CCCTCTACCCACCTGGATCGG	C	2983	1944	0.651692926583976
VU-preSCC-HN1029-p16-TERT-P25	21974665	CDKN2A	CCCTCTACCCACCTGGAT	C	2253	1702	0.755437194851309
VU-preSCC-HN1031-p16-P22	21974665	CDKN2A	CCCTCTACCCACCTGGATCGGCCT	C	3440	1740	0.505813953488372
VU-preSCC-HN1031-p16-TERT-P22	21974665	CDKN2A	CCCTCTACCCACCTGGATCGGCCTCCGA	C	4118	127	0.0308402136959689
VU-preSCC-HN1031-p16-TERT-P22	21974665	CDKN2A	CCCTCTACCCACCTGGATCGGCCTCCGA	CCCTGGATCGGCCTCCGA	4118	152	0.0369111219038368
VU-preSCC-LP140-p16-P15	21974666	CDKN2A	CCTCTACCCACCTGGATCGG	C	298	26	0.087248322147651
VU-preSCC-LP140-p16-TERT-P10	21974666	CDKN2A	CCTCTACCCACCTGGATCGG	C	2870	394	0.137282229965157
VU-preSCC-LP140-p16-TERT-P13	21974666	CDKN2A	CCTCTACCCACCTGGATCGG	C	3051	527	0.17273025237627
VU-preSCC-LP140-p16-TERT-P27	21974666	CDKN2A	CCTCTACCCACCTGGATCGG	C	1721	705	0.409645554909936
VU-UPPP-60-p16-p53-TERT-P32	21974667	CDKN2A	CTCTACCCACCTGGATCGGCCTCCGACCGTAACTATTCGGTGCGTTGG	C	1288	92	0.0714285714285714
VU-preSCC-HN1031-p16-P22	21974667	CDKN2A	CTCTACCCACCTGGATCGGCCTCCGACCGTAACTATTCGG	C	2056	1502	0.730544747081712
VU-preSCC-HN1031-p16-TERT-P22	21974667	CDKN2A	CTCTACCCACCTGGATCGGCCTCCGACCGTAACTATTCGG	C	4584	1075	0.234511343804538
VU-preSCC-HN1031-p16-TERT-P22	21974668	CDKN2A	TCTACCCAC	T	2747	183	0.0666181288678558
VU-preSCC-LP140-p16-P15	21974668	CDKN2A	TCTACCCAC	T	222	73	0.328828828828829
VU-preSCC-LP140-p16-TERT-P10	21974668	CDKN2A	TCTACCCAC	T	2282	237	0.103856266432954
VU-preSCC-LP140-p16-TERT-P13	21974668	CDKN2A	TCTACCCAC	T	2499	251	0.100440176070428
VU-preSCC-LP140-p16-TERT-P27	21974668	CDKN2A	TCTACCCAC	T	944	22	0.0233050847457627
VU-preSCC-HN1029-p16-p53-P33	21974669	CDKN2A	CTACCCACCTGGAT	C	3489	1521	0.435941530524506
VU-preSCC-HN1028-p16-p53-P29	21974671	CDKN2A	ACCCACCTGGAT	A	1797	377	0.209794101279911
VU-preSCC-HN1029-p16-p53-P33	21974671	CDKN2A	ACCCACC	A	1842	120	0.0651465798045603
VU-preSCC-HN1031-p16-TERT-P22	21974671	CDKN2A	ACCCACCTGGATCGGCCTCCGACCG	A	2358	21	0.0089058524173028
VU-preSCC-HN1031-p16-TERT-P22	21974671	CDKN2A	ACCCACCTGGATCGGCCTCCGACCG	ACCTCCGACCG	2358	59	0.0250212044105174
VU-preSCC-HN1031-p16-TERT-P22	21974671	CDKN2A	ACCCACCTGGATCGGCCTCCGACCG	ACGGCCTCCGACCG	2358	36	0.0152671755725191
VU-preSCC-HN1031-p16-p53-TERT-P22	21974671	CDKN2A	ACCCACCTGGATCGGCCTCCGACCGTAACTATTCGGTGCGTTGGGCAGCGCCCCCGCCTCCAGCAGCGCCCGCACCTCCTCTACCCGACCCCGGGCCGCGGCCGTGGCCAGCCAGTCAG	A	4632	136	0.0293609671848014
VU-preSCC-HN1031-p16-p53-TERT-P22	21974671	CDKN2A	ACCCACCTGGATCGGCCTCCGACCGTAACTATTCGGTGCGTTGGGCAGCGCCCCCGCCTCCAGCAGCGCCCGCACCTCCTCTACCCGACCCCGGGCCGCGGCCGTGGCCAGCCAGTCAG	ACGGCCTCCGACCGTAACTATTCGGTGCGTTGGGCAGCGCCCCCGCCTCCAGCAGCGCCCGCACCTCCTCTACCCGACCCCGGGCCGCGGCCGTGGCCAGCCAGTCAG	4632	11	0.00237478411053541
VU-preSCC-HN1031-p16-p53-TERT-P22	21974671	CDKN2A	ACCCACCTGGATCGGCCTCCGACCGTAACTATTCGGTGCGTTGGGCAGCGCCCCCGCCTCCAGCAGCGCCCGCACCTCCTCTACCCGACCCCGGGCCGCGGCCGTGGCCAGCCAGTCAG	ACTGGATCGGCCTCCGACCGTAACTATTCGGTGCGTTGGGCAGCGCCCCCGCCTCCAGCAGCGCCCGCACCTCCTCTACCCGACCCCGGGCCGCGGCCGTGGCCAGCCAGTCAG	4632	42	0.00906735751295337
VU-preSCC-HN1037-p16-P4	21974671	CDKN2A	ACCCACCTGGATCGG	A	1539	4	0.00259909031838856
VU-preSCC-HN1037-p16-P4	21974671	CDKN2A	ACCCACCTGGATCGG	ACGG	1539	212	0.137751786874594
VU-preSCC-HN1037-p16-p53-P15	21974671	CDKN2A	ACCCACCTGGATCGGCCTCCGACCGTAACTATTCGGTGCGTTGGGCAGCG	A	2460	824	0.334959349593496
VU-preSCC-HN1037-p16-p53-P5	21974671	CDKN2A	ACCCACCTGGATCGGCCTCCGACCGTAACTATTCGGTGCGTTGGGCAGCG	A	6334	749	0.118250710451531
VU-preSCC-HN1037-p16-p53-TERT-P5	21974671	CDKN2A	ACCCACCTGGATCGGCCTCCGACCGTAACTATTCGGTGCGTTGGGCAGCG	A	5829	638	0.109452736318408
VU-UPPP-60-p16-p53-TERT-P32	21974672	CDKN2A	CCCACCTGGATCGG	C	746	415	0.556300268096515
VU-UPPP-60-p16-p53-TERT-P32	21974672	CDKN2A	CCCACCTGGATCGG	CCCTGGATCGG	746	26	0.0348525469168901
VU-preSCC-HN1029-p16-TERT-P25	21974672	CDKN2A	CCCACCT	C	625	204	0.3264
VU-preSCC-HN1031-p16-p53-P22	21974672	CDKN2A	CCCACCTGGATCGGCCTCCGACCGTAACTATT	C	4779	380	0.079514542791379
VU-preSCC-HN1037-p16-p53-P5	21974672	CDKN2A	CCCACCT	C	4921	148	0.0300751879699248
VU-preSCC-HN1037-p16-p53-TERT-P5	21974672	CDKN2A	CCCACCT	C	4538	170	0.0374614367562803
VU-UPPP-60-p16-p53-TERT-P32	21974674	CDKN2A	CACCTGGATCGGCCTCCG	C	439	95	0.216400911161731
VU-preSCC-HN1037-p16-p53-P15	21974674	CDKN2A	CACCTGGATCGGCCTCCG	C	1227	1227	1
VU-preSCC-HN1037-p16-p53-P5	21974674	CDKN2A	CACCTGGATCGGCCTCCGACCGTA	C	4648	34	0.00731497418244406
VU-preSCC-HN1037-p16-p53-P5	21974674	CDKN2A	CACCTGGATCGGCCTCCGACCGTA	CACCGTA	4648	1321	0.2842082616179
VU-preSCC-HN1037-p16-p53-TERT-P5	21974674	CDKN2A	CACCTGGATCGGCCTCCGACCGTA	C	4271	22	0.00515101849683915
VU-preSCC-HN1037-p16-p53-TERT-P5	21974674	CDKN2A	CACCTGGATCGGCCTCCGACCGTA	CACCGTA	4271	1195	0.279793959260126
VU-UPPP-60-p16-p53-P31	21974675	CDKN2A	ACCTGGATCGGCCTCCGAC	A	911	905	0.993413830954994
VU-UPPP-60-p16-p53-TERT-P32	21974675	CDKN2A	ACCTGGATCGG	A	226	10	0.0442477876106195
VU-UPPP-60-p16-P27	21974675	CDKN2A	ACCTGGATCGGCCT	A	4425	2088	0.471864406779661
VU-UPPP-60-p16-P27	21974675	CDKN2A	ACCTGGATCGGCCT	ACGGCCT	4425	2335	0.527683615819209
VU-preSCC-HN1009-p16-p53-P15	21974675	CDKN2A	ACCTGGATCGGCCTCCGACCGTAACTATTCGGTGCGTTGGGCAGCGCCCCCG	A	1535	510	0.332247557003257
VU-preSCC-HN1009-p16-p53-P15	21974675	CDKN2A	ACCTGGATCGGCCTCCGACCGTAACTATTCGGTGCGTTGGGCAGCGCCCCCG	ACCTCCGACCGTAACTATTCGGTGCGTTGGGCAGCGCCCCCG	1535	8	0.00521172638436482
VU-preSCC-HN1009-p16-p53-TERT-P20	21974675	CDKN2A	ACCTGGATCGGCCTCCGACCGTAACTATTCGGTGCGTTGGGCAGCGCCCCCG	A	3672	889	0.242102396514161
VU-preSCC-HN1009-p16-p53-TERT-P20	21974675	CDKN2A	ACCTGGATCGGCCTCCGACCGTAACTATTCGGTGCGTTGGGCAGCGCCCCCG	ACCTCCGACCGTAACTATTCGGTGCGTTGGGCAGCGCCCCCG	3672	29	0.00789760348583878
VU-preSCC-HN1028-p16-p53-TERT-P26	21974675	CDKN2A	ACCTGGATCGG	A	4649	251	0.0539901053990105
VU-preSCC-HN1028-p16-p53-TERT-P26	21974675	CDKN2A	ACCTGGATCGG	ACTGGATCGG	4649	2124	0.456872445687245
VU-preSCC-HN1029-p16-P21	21974675	CDKN2A	ACCTGGATCGG	A	2849	437	0.153387153387153
VU-preSCC-HN1031-p16-p53-P22	21974675	CDKN2A	ACCTGGATCGG	A	3453	150	0.0434404865334492
VU-preSCC-HN1031-p16-p53-TERT-P22	21974675	CDKN2A	ACCTGGATCGGCCT	A	3009	39	0.0129611166500499
VU-preSCC-HN1031-p16-p53-TERT-P22	21974675	CDKN2A	ACCTGGATCGGCCT	ACCT	3009	212	0.0704553007643735
VU-preSCC-HN1031-p16-p53-TERT-P22	21974675	CDKN2A	ACCTGGATCGGCCT	ACTGGATCGGCCT	3009	14	0.00465270854104354
VU-preSCC-HN1037-p16-P4	21974675	CDKN2A	ACCTGGATCGGCCTCCGACCGTAACTATTCGGTGCGTTGGGCAGCGCCCCCGCCTCCAGCAGCGCCCGCACCTCCTCTACCCGACCCCGGGCCGCGGCCGTGGCCAGCCAGTCAGCCGAAGGCTCCATGCTGCTCCCCGCCG	A	2149	136	0.0632852489530014
VU-preSCC-HN1037-p16-P4	21974675	CDKN2A	ACCTGGATCGGCCTCCGACCGTAACTATTCGGTGCGTTGGGCAGCGCCCCCGCCTCCAGCAGCGCCCGCACCTCCTCTACCCGACCCCGGGCCGCGGCCGTGGCCAGCCAGTCAGCCGAAGGCTCCATGCTGCTCCCCGCCG	ACCGACCGTAACTATTCGGTGCGTTGGGCAGCGCCCCCGCCTCCAGCAGCGCCCGCACCTCCTCTACCCGACCCCGGGCCGCGGCCGTGGCCAGCCAGTCAGCCGAAGGCTCCATGCTGCTCCCCGCCG	2149	237	0.110283852954863
VU-preSCC-HN1037-p16-P4	21974675	CDKN2A	ACCTGGATCGGCCTCCGACCGTAACTATTCGGTGCGTTGGGCAGCGCCCCCGCCTCCAGCAGCGCCCGCACCTCCTCTACCCGACCCCGGGCCGCGGCCGTGGCCAGCCAGTCAGCCGAAGGCTCCATGCTGCTCCCCGCCG	ACCTCCGACCGTAACTATTCGGTGCGTTGGGCAGCGCCCCCGCCTCCAGCAGCGCCCGCACCTCCTCTACCCGACCCCGGGCCGCGGCCGTGGCCAGCCAGTCAGCCGAAGGCTCCATGCTGCTCCCCGCCG	2149	42	0.0195439739413681
VU-preSCC-HN1037-p16-P4	21974675	CDKN2A	ACCTGGATCGGCCTCCGACCGTAACTATTCGGTGCGTTGGGCAGCGCCCCCGCCTCCAGCAGCGCCCGCACCTCCTCTACCCGACCCCGGGCCGCGGCCGTGGCCAGCCAGTCAGCCGAAGGCTCCATGCTGCTCCCCGCCG	ACGGCCTCCGACCGTAACTATTCGGTGCGTTGGGCAGCGCCCCCGCCTCCAGCAGCGCCCGCACCTCCTCTACCCGACCCCGGGCCGCGGCCGTGGCCAGCCAGTCAGCCGAAGGCTCCATGCTGCTCCCCGCCG	2149	792	0.368543508608655
VU-preSCC-HN1037-p16-P4	21974675	CDKN2A	ACCTGGATCGGCCTCCGACCGTAACTATTCGGTGCGTTGGGCAGCGCCCCCGCCTCCAGCAGCGCCCGCACCTCCTCTACCCGACCCCGGGCCGCGGCCGTGGCCAGCCAGTCAGCCGAAGGCTCCATGCTGCTCCCCGCCG	AGGCCTCCGACCGTAACTATTCGGTGCGTTGGGCAGCGCCCCCGCCTCCAGCAGCGCCCGCACCTCCTCTACCCGACCCCGGGCCGCGGCCGTGGCCAGCCAGTCAGCCGAAGGCTCCATGCTGCTCCCCGCCG	2149	22	0.0102373196835738
VU-preSCC-HN1037-p16-TERT-P14	21974675	CDKN2A	ACCTGGAT	A	2089	2089	1
VU-preSCC-HN1037-p16-TERT-P4	21974675	CDKN2A	ACCTGGATCGGCCT	A	1082	40	0.0369685767097967
VU-preSCC-HN1037-p16-TERT-P4	21974675	CDKN2A	ACCTGGATCGGCCT	ACGGCCT	1082	1037	0.958410351201479
VU-preSCC-HN1037-p16-p53-P5	21974675	CDKN2A	ACCTGGATCGGCCTCCGACCGTAACTATTCGGTGCGTTGGGCAGCGCCCCCGCCTCCAGCAGCGCCCGCACCTCCTCTACCCGACCCCGGGCCGCGGCCGTGGCCAGCCAGTCAGCCGAAGGCTCCATGCTGCTCCCCG	A	4487	32	0.00713171383998217
VU-preSCC-HN1037-p16-p53-P5	21974675	CDKN2A	ACCTGGATCGGCCTCCGACCGTAACTATTCGGTGCGTTGGGCAGCGCCCCCGCCTCCAGCAGCGCCCGCACCTCCTCTACCCGACCCCGGGCCGCGGCCGTGGCCAGCCAGTCAGCCGAAGGCTCCATGCTGCTCCCCG	ACCTCCAGCAGCGCCCGCACCTCCTCTACCCGACCCCGGGCCGCGGCCGTGGCCAGCCAGTCAGCCGAAGGCTCCATGCTGCTCCCCG	4487	41	0.00913750835747716
VU-preSCC-HN1037-p16-p53-P5	21974675	CDKN2A	ACCTGGATCGGCCTCCGACCGTAACTATTCGGTGCGTTGGGCAGCGCCCCCGCCTCCAGCAGCGCCCGCACCTCCTCTACCCGACCCCGGGCCGCGGCCGTGGCCAGCCAGTCAGCCGAAGGCTCCATGCTGCTCCCCG	ACCGCCTCCAGCAGCGCCCGCACCTCCTCTACCCGACCCCGGGCCGCGGCCGTGGCCAGCCAGTCAGCCGAAGGCTCCATGCTGCTCCCCG	4487	712	0.158680632939603
VU-preSCC-HN1037-p16-p53-P5	21974675	CDKN2A	ACCTGGATCGGCCTCCGACCGTAACTATTCGGTGCGTTGGGCAGCGCCCCCGCCTCCAGCAGCGCCCGCACCTCCTCTACCCGACCCCGGGCCGCGGCCGTGGCCAGCCAGTCAGCCGAAGGCTCCATGCTGCTCCCCG	ACCTCCGACCGTAACTATTCGGTGCGTTGGGCAGCGCCCCCGCCTCCAGCAGCGCCCGCACCTCCTCTACCCGACCCCGGGCCGCGGCCGTGGCCAGCCAGTCAGCCGAAGGCTCCATGCTGCTCCCCG	4487	407	0.0907064854022732
VU-preSCC-HN1037-p16-p53-TERT-P5	21974675	CDKN2A	ACCTGGATCGGCCTCCGACCGTAACTATTCGGTGCGTTGGGCAGCGCCCCCGCCTCCAGCAGCGCCCGCACCTCCTCTACCCGACCCCGGGCCGCGGCCGTGGCCAGCCAGTCAGCCGAAGGCTCCATGCTGCTCCCCG	A	3709	81	0.0218387705581019
VU-preSCC-HN1037-p16-p53-TERT-P5	21974675	CDKN2A	ACCTGGATCGGCCTCCGACCGTAACTATTCGGTGCGTTGGGCAGCGCCCCCGCCTCCAGCAGCGCCCGCACCTCCTCTACCCGACCCCGGGCCGCGGCCGTGGCCAGCCAGTCAGCCGAAGGCTCCATGCTGCTCCCCG	ACCTCCAGCAGCGCCCGCACCTCCTCTACCCGACCCCGGGCCGCGGCCGTGGCCAGCCAGTCAGCCGAAGGCTCCATGCTGCTCCCCG	3709	54	0.0145591803720679
VU-preSCC-HN1037-p16-p53-TERT-P5	21974675	CDKN2A	ACCTGGATCGGCCTCCGACCGTAACTATTCGGTGCGTTGGGCAGCGCCCCCGCCTCCAGCAGCGCCCGCACCTCCTCTACCCGACCCCGGGCCGCGGCCGTGGCCAGCCAGTCAGCCGAAGGCTCCATGCTGCTCCCCG	ACCGCCTCCAGCAGCGCCCGCACCTCCTCTACCCGACCCCGGGCCGCGGCCGTGGCCAGCCAGTCAGCCGAAGGCTCCATGCTGCTCCCCG	3709	630	0.169857104340793
VU-preSCC-HN1037-p16-p53-TERT-P5	21974675	CDKN2A	ACCTGGATCGGCCTCCGACCGTAACTATTCGGTGCGTTGGGCAGCGCCCCCGCCTCCAGCAGCGCCCGCACCTCCTCTACCCGACCCCGGGCCGCGGCCGTGGCCAGCCAGTCAGCCGAAGGCTCCATGCTGCTCCCCG	ACCTCCGACCGTAACTATTCGGTGCGTTGGGCAGCGCCCCCGCCTCCAGCAGCGCCCGCACCTCCTCTACCCGACCCCGGGCCGCGGCCGTGGCCAGCCAGTCAGCCGAAGGCTCCATGCTGCTCCCCG	3709	371	0.100026961445133
VU-preSCC-LP140-p16-P15	21974675	CDKN2A	A	AGCCCCT	150	13	0.0866666666666667
VU-preSCC-LP140-p16-TERT-P10	21974675	CDKN2A	ACCTGGATCGG	A	1710	15	0.0087719298245614
VU-preSCC-LP140-p16-TERT-P13	21974675	CDKN2A	ACCTGGATCGG	A	1855	55	0.0296495956873315
VU-preSCC-LP140-p16-TERT-P27	21974675	CDKN2A	A	AGCCCCT	866	824	0.951501154734411
VU-UPPP-60-p16-TERT-P32	21974676	CDKN2A	CCTGGATCGGCCTCCGACCGTAA	C	937	198	0.211312700106724
VU-preSCC-HN1009-p16-p53-P15	21974676	CDKN2A	CCTGGATCGG	C	1600	246	0.15375
VU-preSCC-HN1028-p16-P20	21974676	CDKN2A	C	CTTCTTCACCAATAGCTATATATATTTTTCACAAGAG	1349	460	0.340993328391401
VU-preSCC-HN1037-p16-p53-P5	21974676	CDKN2A	CCTGGATCGGCCTCCGACCGTAACTATTCGGTGCGTTGGGCAGCGCCCCCGCCTCCAGCAGCGCCCGCA	C	3237	31	0.00957676861291319
VU-preSCC-HN1037-p16-p53-P5	21974676	CDKN2A	CCTGGATCGGCCTCCGACCGTAACTATTCGGTGCGTTGGGCAGCGCCCCCGCCTCCAGCAGCGCCCGCA	CCCAGCAGCGCCCGCA	3237	131	0.0404695705900525
VU-preSCC-HN1037-p16-p53-P5	21974676	CDKN2A	CCTGGATCGGCCTCCGACCGTAACTATTCGGTGCGTTGGGCAGCGCCCCCGCCTCCAGCAGCGCCCGCA	CCGGCCTCCGACCGTAACTATTCGGTGCGTTGGGCAGCGCCCCCGCCTCCAGCAGCGCCCGCA	3237	90	0.0278035217794254
VU-preSCC-HN1037-p16-p53-TERT-P5	21974676	CDKN2A	CCTGGATCGGCCTCCGACCGTAACTATTCGGTGCGTTGGGCAGCGCCCCCGCCTCCAGCAGCGCCCGCA	C	2570	22	0.00856031128404669
VU-preSCC-HN1037-p16-p53-TERT-P5	21974676	CDKN2A	CCTGGATCGGCCTCCGACCGTAACTATTCGGTGCGTTGGGCAGCGCCCCCGCCTCCAGCAGCGCCCGCA	CCCAGCAGCGCCCGCA	2570	146	0.0568093385214008
VU-preSCC-HN1037-p16-p53-TERT-P5	21974676	CDKN2A	CCTGGATCGGCCTCCGACCGTAACTATTCGGTGCGTTGGGCAGCGCCCCCGCCTCCAGCAGCGCCCGCA	CCGGCCTCCGACCGTAACTATTCGGTGCGTTGGGCAGCGCCCCCGCCTCCAGCAGCGCCCGCA	2570	120	0.0466926070038911
VU-preSCC-LP140-p16-P15	21974676	CDKN2A	CCTGGATCG	C	166	9	0.0542168674698795
VU-preSCC-LP140-p16-TERT-P10	21974676	CDKN2A	CCTGGATCG	C	1862	344	0.184747583243824
VU-preSCC-LP140-p16-TERT-P13	21974676	CDKN2A	CCTGGATCG	C	1837	323	0.175830157866086
VU-UPPP-60-p16-TERT-P32	21974677	CDKN2A	CTGGATCGGCCTCCGACCGTAACTATTCGGTGCGTTGGGCAGCG	C	753	564	0.749003984063745	p.A36fs
VU-UPPP-60-p16-p53-TERT-P32	21974677	CDKN2A	CTG	C	242	28	0.115702479338843	p.Q50fs
VU-UPPP-60-p16-p53-TERT-P32	21974677	CDKN2A	CTG	CG	242	33	0.136363636363636	p.Q50fs
VU-UPPP-60-p16-p53-TERT-P32	21974677	CDKN2A	CTG	CGTG	242	5	0.0206611570247934	p.Q50fs
VU-UPPP-60-p16-p53-TERT-P32	21974677	CDKN2A	CTG	CTTG	242	30	0.12396694214876	p.V51fs
VU-preSCC-HN1009-p16-p53-P15	21974677	CDKN2A	CT	C	1241	12	0.0096696212731668	p.Q50fs
VU-preSCC-HN1009-p16-p53-P15	21974677	CDKN2A	CT	CTT	1241	698	0.562449637389202	p.V51fs
VU-preSCC-HN1009-p16-p53-TERT-P20	21974677	CDKN2A	CTGGATCGGCCTCCGACCG	C	2596	216	0.0832049306625578	p.44_50YGRRPIQ>*
VU-preSCC-HN1009-p16-p53-TERT-P20	21974677	CDKN2A	CTGGATCGGCCTCCGACCG	CGATCGGCCTCCGACCG	2596	899	0.346302003081664	p.Q50fs
VU-preSCC-HN1009-p16-p53-TERT-P20	21974677	CDKN2A	CTGGATCGGCCTCCGACCG	CGGATCGGCCTCCGACCG	2596	260	0.100154083204931	p.Q50fs
VU-preSCC-HN1009-p16-p53-TERT-P20	21974677	CDKN2A	CTGGATCGGCCTCCGACCG	CTTGGATCGGCCTCCGACCG	2596	1213	0.467257318952234	p.V51fs
VU-preSCC-HN1028-p16-P20	21974677	CDKN2A	CTG	C	635	167	0.262992125984252	p.Q50fs
VU-preSCC-HN1028-p16-TERT-P34	21974677	CDKN2A	C	CATGAAAGTCCCTCTCCCCACTCACCCCAGAATAAATCCCCAGCTGGCAGGACGCCAGGCTG	319	46	0.144200626959248	p.Q50fs
VU-preSCC-HN1028-p16-p53-P29	21974677	CDKN2A	CTG	CTTG	1296	31	0.0239197530864198	p.V51fs
VU-preSCC-HN1028-p16-p53-TERT-P26	21974677	CDKN2A	CT	C	4442	2270	0.511031067086898	p.Q50fs
VU-preSCC-HN1029-p16-P21	21974677	CDKN2A	CTG	C	2498	1690	0.676541232986389	p.Q50fs
VU-preSCC-HN1029-p16-TERT-P25	21974677	CDKN2A	CTG	CTTG	250	4	0.016	p.V51fs
VU-preSCC-HN1029-p16-p53-P33	21974677	CDKN2A	C	CT	1608	118	0.0733830845771144	p.V51fs
VU-preSCC-HN1029-p16-p53-P33	21974677	CDKN2A	C	CGTAATAGATCGTAATAGATCTATTACCCACCGTAA	1608	1490	0.926616915422886	p.Q50fs
VU-preSCC-HN1031-p16-TERT-P22	21974677	CDKN2A	CTGGA	CGA	2257	1618	0.716880815241471	p.Q50fs
VU-preSCC-HN1031-p16-TERT-P22	21974677	CDKN2A	CTGGA	C	2257	6	0.00265839610101905	p.I49fs
VU-preSCC-HN1031-p16-TERT-P22	21974677	CDKN2A	CTGGA	CGTGGA	2257	35	0.0155073105892778	p.Q50fs
VU-preSCC-HN1031-p16-TERT-P22	21974677	CDKN2A	CTGGA	CTTGGA	2257	9	0.00398759415152858	p.V51fs
VU-preSCC-HN1031-p16-TERT-P22	21974677	CDKN2A	CTGGA	CTTTGGA	2257	155	0.0686752326096588	p.V51fs
VU-preSCC-HN1031-p16-p53-P22	21974677	CDKN2A	CTGGATCG	C	3141	1225	0.390003183699459	p.P48fs
VU-preSCC-HN1031-p16-p53-P22	21974677	CDKN2A	CTGGATCG	CGGATCG	3141	1312	0.417701368990767	p.Q50fs
VU-preSCC-HN1031-p16-p53-P22	21974677	CDKN2A	CTGGATCG	CTTGGATCG	3141	13	0.00413880929640242	p.V51fs
VU-preSCC-HN1031-p16-p53-P22	21974677	CDKN2A	CTGGATCG	CTTTGGATCG	3141	5	0.00159184972938555	p.V51fs
VU-preSCC-HN1031-p16-p53-TERT-P22	21974677	CDKN2A	CTGGATCG	C	3037	1084	0.356931182087586	p.P48fs
VU-preSCC-HN1031-p16-p53-TERT-P22	21974677	CDKN2A	CTGGATCG	CGATCG	3037	29	0.00954889693776753	p.Q50fs
VU-preSCC-HN1031-p16-p53-TERT-P22	21974677	CDKN2A	CTGGATCG	CGGATCG	3037	1100	0.362199539018769	p.Q50fs
VU-preSCC-HN1031-p16-p53-TERT-P22	21974677	CDKN2A	CTGGATCG	CTTGGATCG	3037	82	0.0270003292723082	p.V51fs
VU-preSCC-HN1031-p16-p53-TERT-P22	21974677	CDKN2A	CTGGATCG	CTTTGGATCG	3037	22	0.00724399078037537	p.V51fs
VU-preSCC-HN1037-p16-p53-TERT-P5	21974677	CDKN2A	CTGGATCGGCCTCCGACCG	C	2243	1174	0.523406152474365	p.44_50YGRRPIQ>*
VU-preSCC-HN1037-p16-p53-TERT-P5	21974677	CDKN2A	CTGGATCGGCCTCCGACCG	CCGGCCTCCGACCG	2243	111	0.0494872938029425	p.I49fs
VU-preSCC-HN1037-p16-p53-TERT-P5	21974677	CDKN2A	CTGGATCGGCCTCCGACCG	CGGATCGGCCTCCGACCG	2243	423	0.188586714222024	p.Q50fs
VU-preSCC-HN1037-p16-p53-TERT-P5	21974677	CDKN2A	CTGGATCGGCCTCCGACCG	CAATGGATCGGCCTCCGACCG	2243	243	0.108337048595631	p.Q50fs
VU-preSCC-HN1037-p16-p53-TERT-P5	21974677	CDKN2A	CTGGATCGGCCTCCGACCG	CGTAACTATTAGTGGATCGGCCTCCGACCG	2243	153	0.0682122157824342	p.Q50fs
VU-preSCC-LP140-p16-P15	21974677	CDKN2A	CTG	C	204	62	0.303921568627451	p.Q50fs
VU-preSCC-LP140-p16-P15	21974677	CDKN2A	CTG	CG	204	17	0.0833333333333333	p.Q50fs
VU-preSCC-LP140-p16-P15	21974677	CDKN2A	CTG	CTTG	204	23	0.112745098039216	p.V51fs
VU-preSCC-LP140-p16-TERT-P10	21974677	CDKN2A	CTG	C	1842	260	0.141150922909881	p.Q50fs
VU-preSCC-LP140-p16-TERT-P10	21974677	CDKN2A	CTG	CG	1842	175	0.0950054288816504	p.Q50fs
VU-preSCC-LP140-p16-TERT-P10	21974677	CDKN2A	CTG	CTTG	1842	424	0.230184581976113	p.V51fs
VU-preSCC-LP140-p16-TERT-P13	21974677	CDKN2A	CTG	C	1894	266	0.140443505807814	p.Q50fs
VU-preSCC-LP140-p16-TERT-P13	21974677	CDKN2A	CTG	CG	1894	186	0.0982048574445618	p.Q50fs
VU-preSCC-LP140-p16-TERT-P13	21974677	CDKN2A	CTG	CTTG	1894	404	0.213305174234424	p.V51fs
VU-preSCC-LP140-p16-TERT-P13	21974677	CDKN2A	CTG	CTTTG	1894	5	0.00263991552270327	p.V51fs
VU-preSCC-LP140-p16-TERT-P27	21974677	CDKN2A	CTG	C	901	33	0.0366259711431743	p.Q50fs
VU-UPPP-60-p16-p53-TERT-P32	21974678	CDKN2A	T	TCTACCCACC	223	102	0.457399103139013	p.Q50RWVE
VU-preSCC-HN1029-p16-P21	21974678	CDKN2A	TGG	T	672	604	0.898809523809524	p.Q50fs
VU-preSCC-HN1031-p16-p53-P22	21974678	CDKN2A	TGG	T	2046	563	0.275171065493646	p.Q50fs
VU-preSCC-HN1031-p16-p53-TERT-P22	21974678	CDKN2A	TGG	T	1760	410	0.232954545454545	p.Q50fs
VU-preSCC-HN1037-p16-p53-P5	21974678	CDKN2A	T	TCAA	1134	81	0.0714285714285714	p.Q50LE
VU-preSCC-HN1037-p16-p53-TERT-P5	21974678	CDKN2A	T	TCAA	1252	104	0.0830670926517572	p.Q50LE
VU-preSCC-LP140-p16-P15	21974678	CDKN2A	TGG	T	171	13	0.0760233918128655	p.Q50fs
VU-preSCC-LP140-p16-TERT-P10	21974678	CDKN2A	TGG	T	1551	333	0.214700193423598	p.Q50fs
VU-preSCC-LP140-p16-TERT-P10	21974678	CDKN2A	TGG	TCGG	1551	11	0.00709219858156028	p.Q50fs
VU-preSCC-LP140-p16-TERT-P10	21974678	CDKN2A	TGG	TGGAGG	1551	49	0.0315925209542231	p.49_50insL
VU-preSCC-LP140-p16-TERT-P13	21974678	CDKN2A	TGG	T	1632	492	0.301470588235294	p.Q50fs
VU-preSCC-LP140-p16-TERT-P13	21974678	CDKN2A	TGG	TGGAGG	1632	22	0.0134803921568627	p.49_50insL
VU-preSCC-LP140-p16-TERT-P27	21974678	CDKN2A	TGG	T	844	804	0.95260663507109	p.Q50fs
VU-UPPP-60-p16-TERT-P32	21974679	CDKN2A	G	GTAC	164	121	0.73780487804878	p.49_50insV
VU-preSCC-HN1029-p16-p53-P33	21974679	CDKN2A	G	A	1776	1490	0.838963963963964	p.Q50*
VU-preSCC-HN1029-p16-p53-TERT-P37	21974679	CDKN2A	G	GTCAGCCGAA	8	7	0.875	p.49_50insFG*
VU-preSCC-HN1037-p16-p53-P5	21974679	CDKN2A	GGA	G	1331	82	0.0616078136739294	p.I49fs
VU-preSCC-HN1037-p16-p53-TERT-P5	21974679	CDKN2A	GGA	G	1283	98	0.0763834762275916	p.I49fs
VU-UPPP-60-p16-p53-TERT-P32	21974680	CDKN2A	GA	G	252	100	0.396825396825397	p.I49fs
VU-preSCC-HN1029-p16-TERT-P25	21974680	CDKN2A	GA	G	564	205	0.363475177304965	p.I49fs
VU-preSCC-HN1037-p16-p53-P5	21974680	CDKN2A	GA	G	1160	148	0.127586206896552	p.I49fs
VU-preSCC-HN1037-p16-p53-TERT-P5	21974680	CDKN2A	GA	G	1229	170	0.138323840520749	p.I49fs
VU-preSCC-HN1029-p16-P21	21974681	CDKN2A	A	T	2329	600	0.25762129669386	p.I49N
VU-preSCC-HN1031-p16-p53-P22	21974681	CDKN2A	ATCGGCCTCCGACC	A	2545	568	0.223182711198428	p.G45fs
VU-preSCC-HN1031-p16-p53-TERT-P22	21974681	CDKN2A	ATCGGCCTCCGACC	A	1835	366	0.199455040871935	p.G45fs
VU-preSCC-HN1031-p16-p53-TERT-P22	21974681	CDKN2A	ATCGGCCTCCGACC	ACGGCCTCCGACC	1835	20	0.0108991825613079	p.I49fs
VU-preSCC-HN1037-p16-p53-P5	21974681	CDKN2A	A	G	970	195	0.201030927835052	p.I49T
VU-preSCC-HN1037-p16-p53-TERT-P5	21974681	CDKN2A	A	G	918	179	0.194989106753813	p.I49T
VU-preSCC-LP140-p16-P15	21974681	CDKN2A	A	C	221	14	0.0633484162895928	p.I49S
VU-preSCC-LP140-p16-TERT-P10	21974681	CDKN2A	AT	A	1853	16	0.00863464651915812	p.I49fs
VU-preSCC-LP140-p16-TERT-P10	21974681	CDKN2A	AT	CT	1853	316	0.170534268753373	p.I49S
VU-preSCC-LP140-p16-TERT-P13	21974681	CDKN2A	AT	A	1933	12	0.00620796689084325	p.I49fs
VU-preSCC-LP140-p16-TERT-P13	21974681	CDKN2A	AT	CT	1933	467	0.24159337816865	p.I49S
VU-preSCC-LP140-p16-TERT-P27	21974681	CDKN2A	A	C	858	788	0.918414918414918	p.I49S
VU-preSCC-HN1031-p16-P22	21974682	CDKN2A	TC	T	130	129	0.992307692307692	p.I49fs
VU-preSCC-HN1037-p16-p53-P5	21974682	CDKN2A	T	TAGTTA	1184	195	0.164695945945946	p.I49fs
VU-preSCC-HN1037-p16-p53-TERT-P5	21974682	CDKN2A	T	TAGTTA	1168	178	0.152397260273973	p.I49fs
VU-preSCC-LP140-p16-P15	21974682	CDKN2A	T	TTTTA	210	14	0.0666666666666667	p.I49fs
VU-preSCC-LP140-p16-TERT-P10	21974682	CDKN2A	T	TTTTA	1849	319	0.172525689561925	p.I49fs
VU-preSCC-LP140-p16-TERT-P13	21974682	CDKN2A	T	TTTTA	1917	472	0.24621804903495	p.I49fs
VU-preSCC-LP140-p16-TERT-P27	21974682	CDKN2A	T	TTTTA	858	788	0.918414918414918	p.I49fs
VU-preSCC-HN1037-p16-p53-P5	21974683	CDKN2A	CGG	C	1435	96	0.0668989547038328	p.P48fs
VU-preSCC-HN1037-p16-p53-TERT-P5	21974683	CDKN2A	CGG	C	1448	107	0.0738950276243094	p.P48fs
VU-preSCC-HN1029-p16-TERT-P25	21974685	CDKN2A	GC	G	2257	202	0.0894993354009747	p.R47fs
VU-preSCC-HN1037-p16-p53-P5	21974685	CDKN2A	G	GTAA	1448	84	0.0580110497237569	p.47_48insL
VU-preSCC-HN1037-p16-p53-TERT-P5	21974685	CDKN2A	G	GTAA	1442	98	0.0679611650485437	p.47_48insL
VU-preSCC-HN1037-p16-p53-P5	21974689	CDKN2A	C	CA	1943	73	0.0375707668553783	p.R47fs
VU-preSCC-HN1037-p16-p53-TERT-P5	21974689	CDKN2A	C	CA	2000	86	0.043	p.R47fs
VU-preSCC-HN1037-p16-p53-P5	21974690	CDKN2A	C	A	1933	71	0.0367304707708226	p.R46L
VU-preSCC-HN1037-p16-p53-TERT-P5	21974690	CDKN2A	C	A	2009	85	0.0423096067695371	p.R46L
VU-preSCC-HN1031-p16-p53-P22	21974697	CDKN2A	A	T	4606	566	0.122883195831524	p.Y44N
VU-preSCC-HN1031-p16-p53-TERT-P22	21974697	CDKN2A	A	T	4133	367	0.0887974836680377	p.Y44N
VU-preSCC-HN1031-p16-TERT-P22	139412303	NOTCH1	G	A	4848	1754	0.361798679867987	p.R448*
VU-preSCC-HN1029-p16-P21	44732807	KDM6A	T	A	2055	44	0.0214111922141119	p.C4S
VU-preSCC-HN1029-p16-TERT-P25	44732807	KDM6A	T	A	1903	42	0.022070415133999	p.C4S
VU-preSCC-HN1028-p16-p53-TERT-P26	44935973	KDM6A	A	T	484	425	0.878099173553719	p.S964C
LP084-TERT	7578176	TP53	CCTCAGG	C	2486	2483	0.998793242156074
LP084-TERT	139413165	NOTCH1	C	A	3311	1642	0.495922681969194	p.G326V
VU-preSCC-M3	7578492	TP53	C	T	976	491	0.503073770491803	p.W146*
VU-preSCC-M3-TERT	7578492	TP53	C	T	1349	551	0.408450704225352	p.W146*
VU-preSCC-M3	7579355	TP53	A	T	855	434	0.507602339181286	p.L111Q
VU-preSCC-M3-TERT	7579355	TP53	A	T	1219	755	0.619360131255127	p.L111Q
VU-preSCC-M3	139395013	NOTCH1	ACCTT	A	1143	463	0.405074365704287	p.Q1974fs
VU-preSCC-M3-TERT	139395013	NOTCH1	ACCTT	A	1429	570	0.39888033589923	p.Q1974fs
VU-preSCC-M3	139399551	NOTCH1	AG	A	1067	596	0.558575445173383	p.L1531fs
VU-preSCC-M3-TERT	139399551	NOTCH1	AG	A	1324	771	0.582326283987915	p.L1531fs
LP085	176636763	NSD1	A	AT	2456	465	0.189332247557003	p.M455fs
VU-preSCC-HN1028-p16-P20	21974675	CDKN2A	A	AT	1375	460	0.334545454545455
VU-preSCC-HN1029-p16-p53-P33	139400271	NOTCH1	G	GT	3265	1519	0.465237366003063	p.N1359fs
VU-UPPP-60-p16-P27	7579470	TP53	C	CG	2323	2268	0.976323719328455	p.V73fs
VU-UPPP-60-p16-p53-TERT-P32	7579470	TP53	C	CG	1334	43	0.0322338830584708	p.V73fs
VU-UPPP-60-p16-TERT-P32	21974681	CDKN2A	A	AAATCACCTGTACGACTAGAAAGTGTCCCCCTACCCCCTCAACCCTTGATTTTCAGGAGCGCGGGGT	152	121	0.796052631578947	p.I49NPALLKIKG*GGRGTLSSRTGDF
VU-UPPP-60-p16-p53-P31	21974677	CDKN2A	G	T	756	756	1.00	p.R474S
VU-preSCC-HN1009-p16-TERT-P19	21974672	CDKN2A	T	C	556	556	1.00	p.K200R
VU-preSCC-HN1009-p16-P17	21974672	CDKN2A	G	C	201	201	1.00	p.L41V
VU-preSCC-HN1037-p16-p53-P15	7578372	TP53	G	A	2548	2548	1.00	p.R1786*
